# Supplementary material for: Differential role for hepatic glucuronidation and sulfonation in controlling the 24S- hydroxycholesterol ability activate LXR
Source: Research Square preprint supplement (doi:10.21203/rs.3.rs-7142616/v1), 2025-08-11
Supplement: Supplementary file 1 [file 6f984c63eed58fe8508c9146.pdf]

## ***SUPPLEMENTAL MATERIALS***

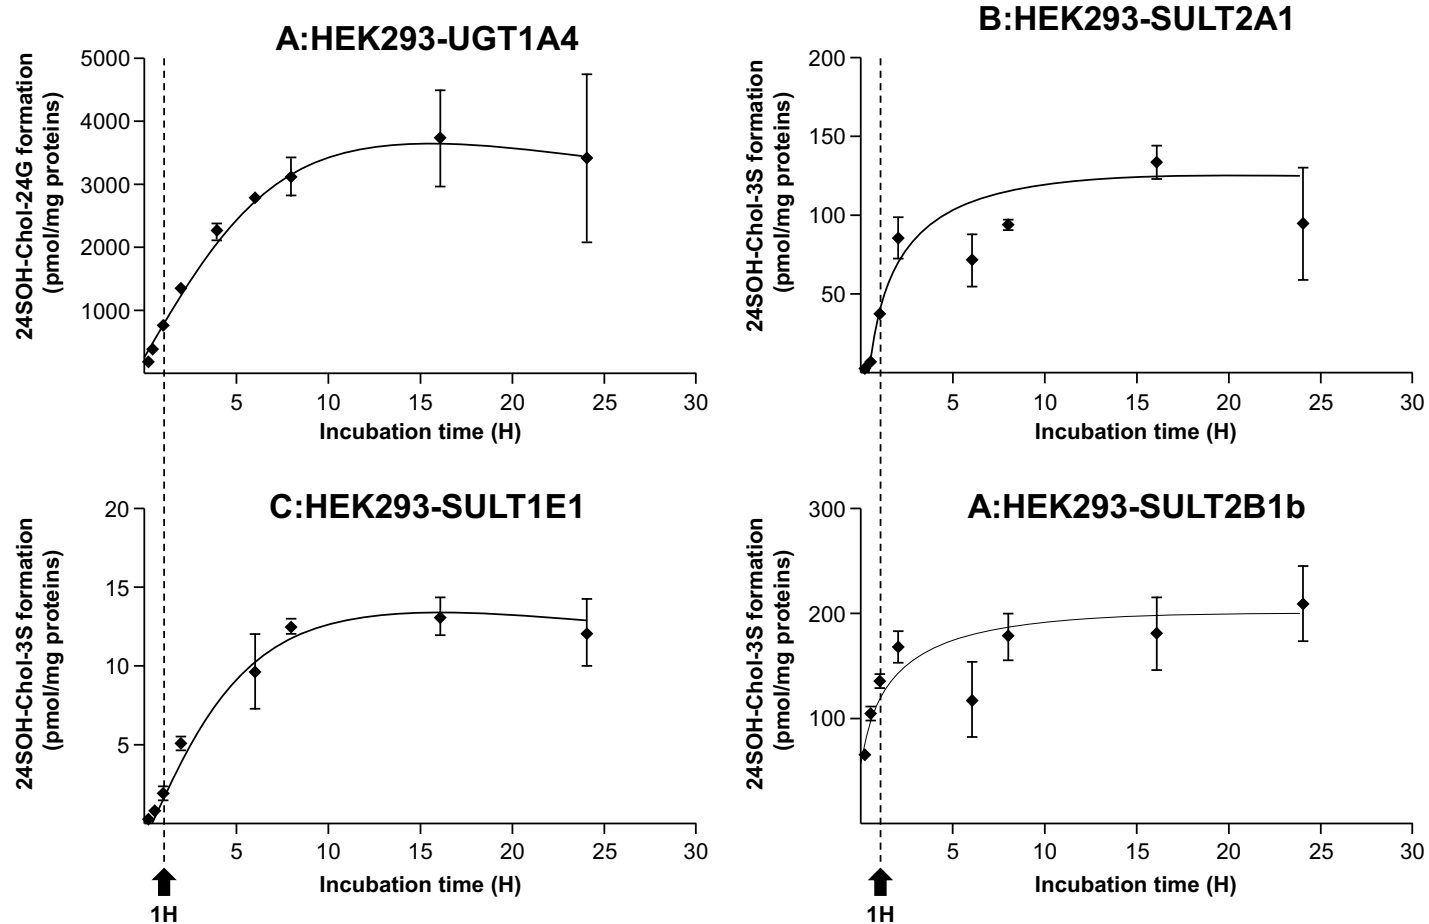

**Supplemental Figure 1. 24SOH-Chol conjugation by human UGT and SULT enzymes is linear for up to 1H.**

Glucuronidation (A) or sulfonation (B-D) assays were performed for up to 24H with homogenates from HEK293 cells overexpressing the human UGT1A4 (A), SULT2A1 (B), SULT1E1 (C) or SULT2B1b (D). 24SOH-Chol-3S and 24SOH-Chol-24G were quantified by LC-MS/MS. Data represent the mean  $\pm$  SD of 2 independent experiments performed in triplicate.

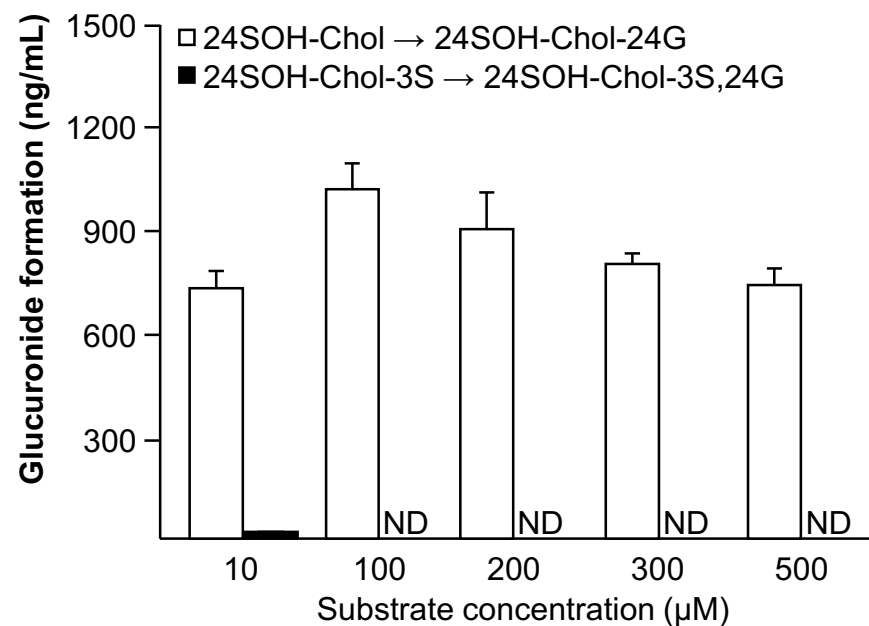

**Supplemental Figure 2. Human liver homogenates fail to glucuronidate 24SOH-Chol-3S.**

Human liver homogenates (50μg) were incubated in the presence of increasing concentrations (10 to 500μM) of 24S-hydroxycholesterol or its sulfated derivative 24SOH-Chol-3S for 1H at 37°C. 24SOH-Chol-24G and 24SOH-Chol-3S,24G were quantified by LC-MS/MS.

Data represent the mean ± SD of 2 independent experiments performed in triplicate.

**A**

| Solutions                   | Buffer          |           |                               |
|-----------------------------|-----------------|-----------|-------------------------------|
|                             | Glucuronidation | Sulfation | Glucuronidation and sulfation |
| Tris-HCl pH 7.5 50mM        | X               | X         | X                             |
| MgCl <sub>2</sub>           | X (10mM)        | X (1mM)   | X (10mM)                      |
| Phosphatidylcholine 10µg/mL | X               |           | X                             |
| Pepstatine 2.5µg/mL         | X               |           | X                             |
| Leupeptine 0.5µg/mL         | X               |           | X                             |
| Alamethicin 0.025µg/mL      | X               |           | X                             |
| BSA 1mg/mL                  |                 | X         | X                             |
| DTT 7.5mM                   |                 | X         | X                             |

**B**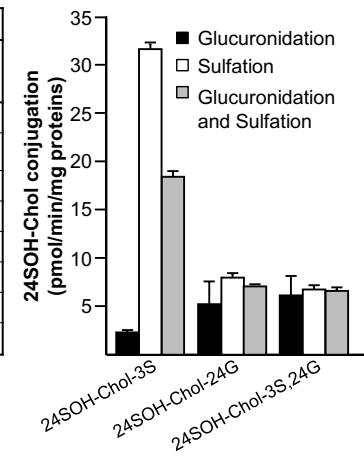**C, UGT1A4**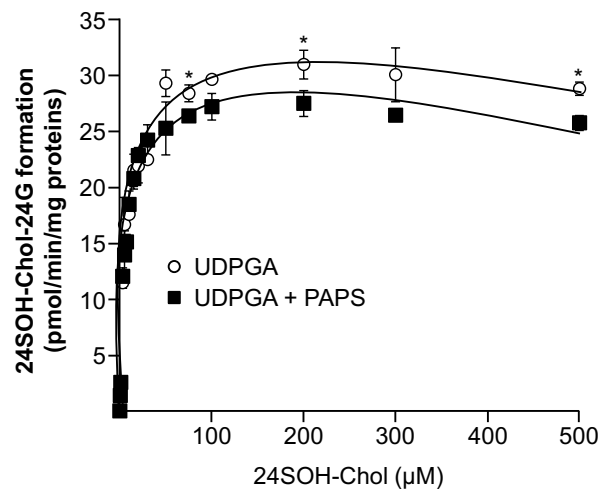**D, SULT2A1**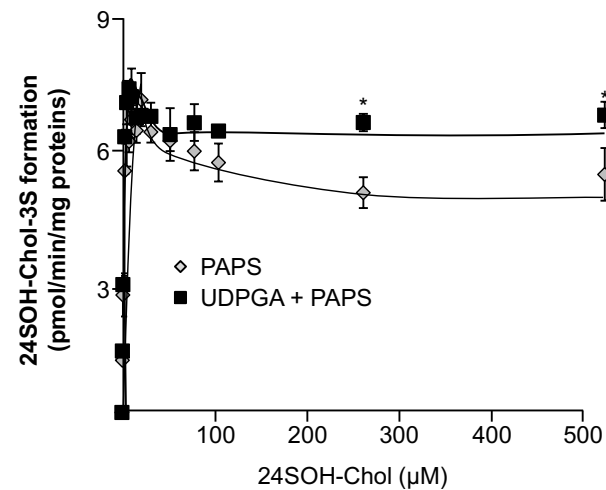

**Supplemental Figure 3. The glucuronidation/sulfonation assay buffer (A) minimally impacts the respective conjugation reactions (B-D).**

**(A)** Composition of the enzymatic assay buffers.

**(B)** Conjugation assays were performed using liver homogenates (50µg) and 24S-hydroxycholesterol (100µM) which were incubated for 1H at 37°C in the corresponding assay buffer **(A)**.

**(C-D)** Glucuronidation **(C)** and sulfonation **(D)** assays were performed for 1H at 37°C using either the glucuronidation **(C)**, sulfonation **(D)** or glucuronidation/sulfonation **(C&D)** buffers, and homogenates (50µg) from HEK293 cells expressing the human UGT1A4 **(C)** or SULT2A1 **(D)** enzymes in the presence of increasing concentrations (0.5 to 500µM) of 24S-hydroxycholesterol.

The formation of conjugated forms of 24SOH-Chol was resolved by LC-MS/MS. Data represent the mean ± SD of 2 independent experiments performed in triplicate. Statistically significant differences are indicated by asterisks (\*:p<0.05).

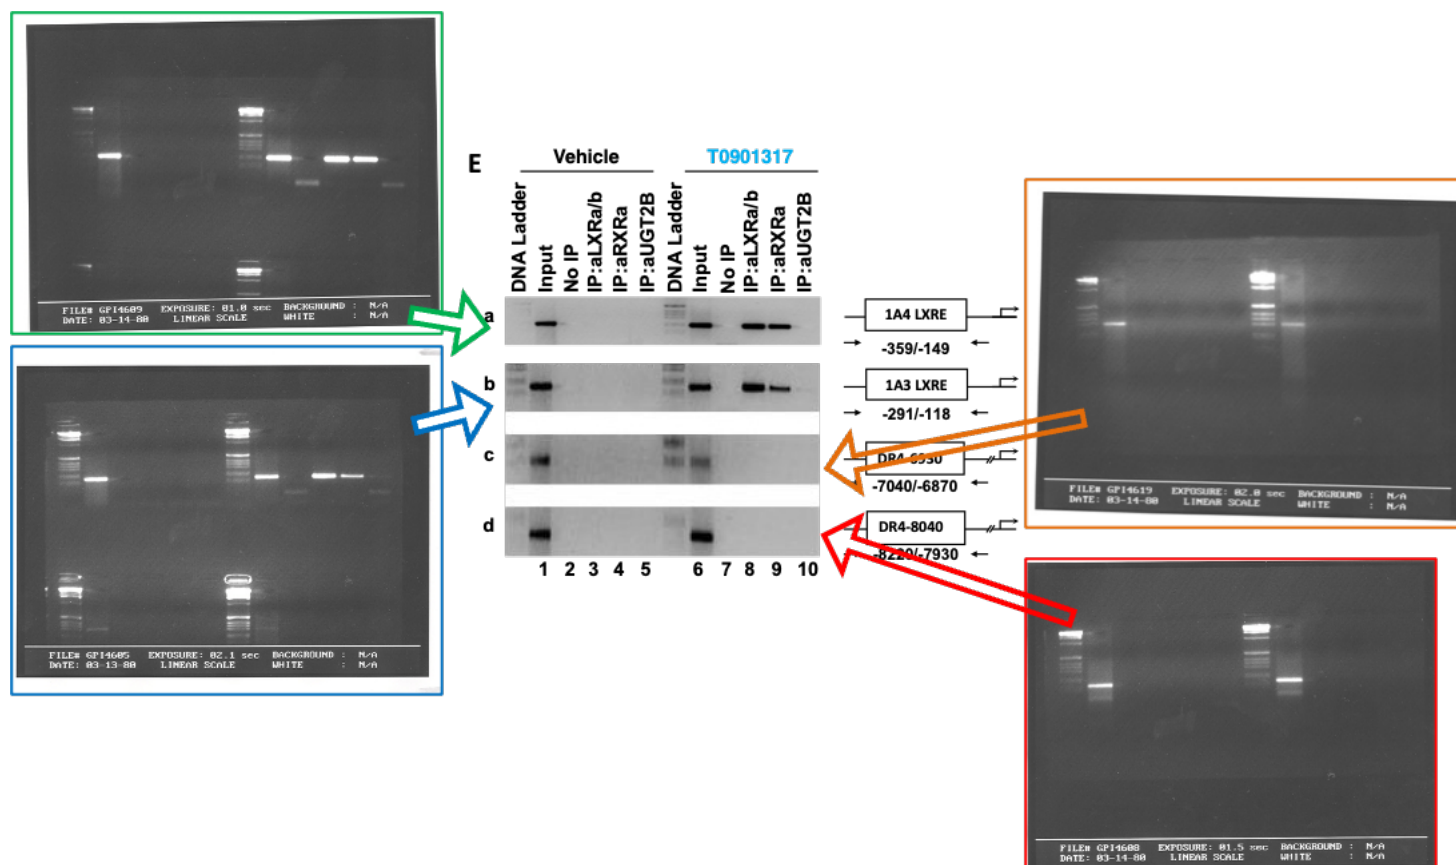

**Supplemental Figure 4. Full-length gels version of the gelshift experiment depicted in panel F of the Figure 5.**
